# Supplementary material for: Preference of Thrips tabaci Lind. for Allium cepa L., Allium fistulosum L., and Allium roylei Stearn
Source: Preprints.org preprint supplement (doi:10.20944/preprints202309.0009.v1), 2023-09-01
Supplement: Supplementary file 1 [file supplementary]

Non-published material

| Species/Cultivar/Year | Mean area of damaged leaves by feedin thrips % | |
| --- | --- | --- |
| 2015 | 2016 |
| *Allium fistulosum* cv. Krol | 6.5 | 1.5 |
